# Supplementary material for: Cyclin E1 in Murine and Human Liver Cancer: A Promising Target for Therapeutic Intervention during Tumour Progression
Source: MDPI journal article supplement (doi:10.3390/cancers13225680), 2021-11-13
Supplement: s1 [file s1]

# Supplementary Material: Cyclin E1 in Murine and Human Liver Cancer: A Promising Target for Therapeutic Intervention during Tumour Progression

Roland Sonntag, Christian Penners, Marlene Kohlhepp, Ute Haas, Daniela Lambertz, Andreas Kroh, Thorsten Cramer, Fabio Ticconi, Ivan G. Costa, Frank Tacke, Nikolaus Gassler, Christian Trautwein and Christian Liedtke

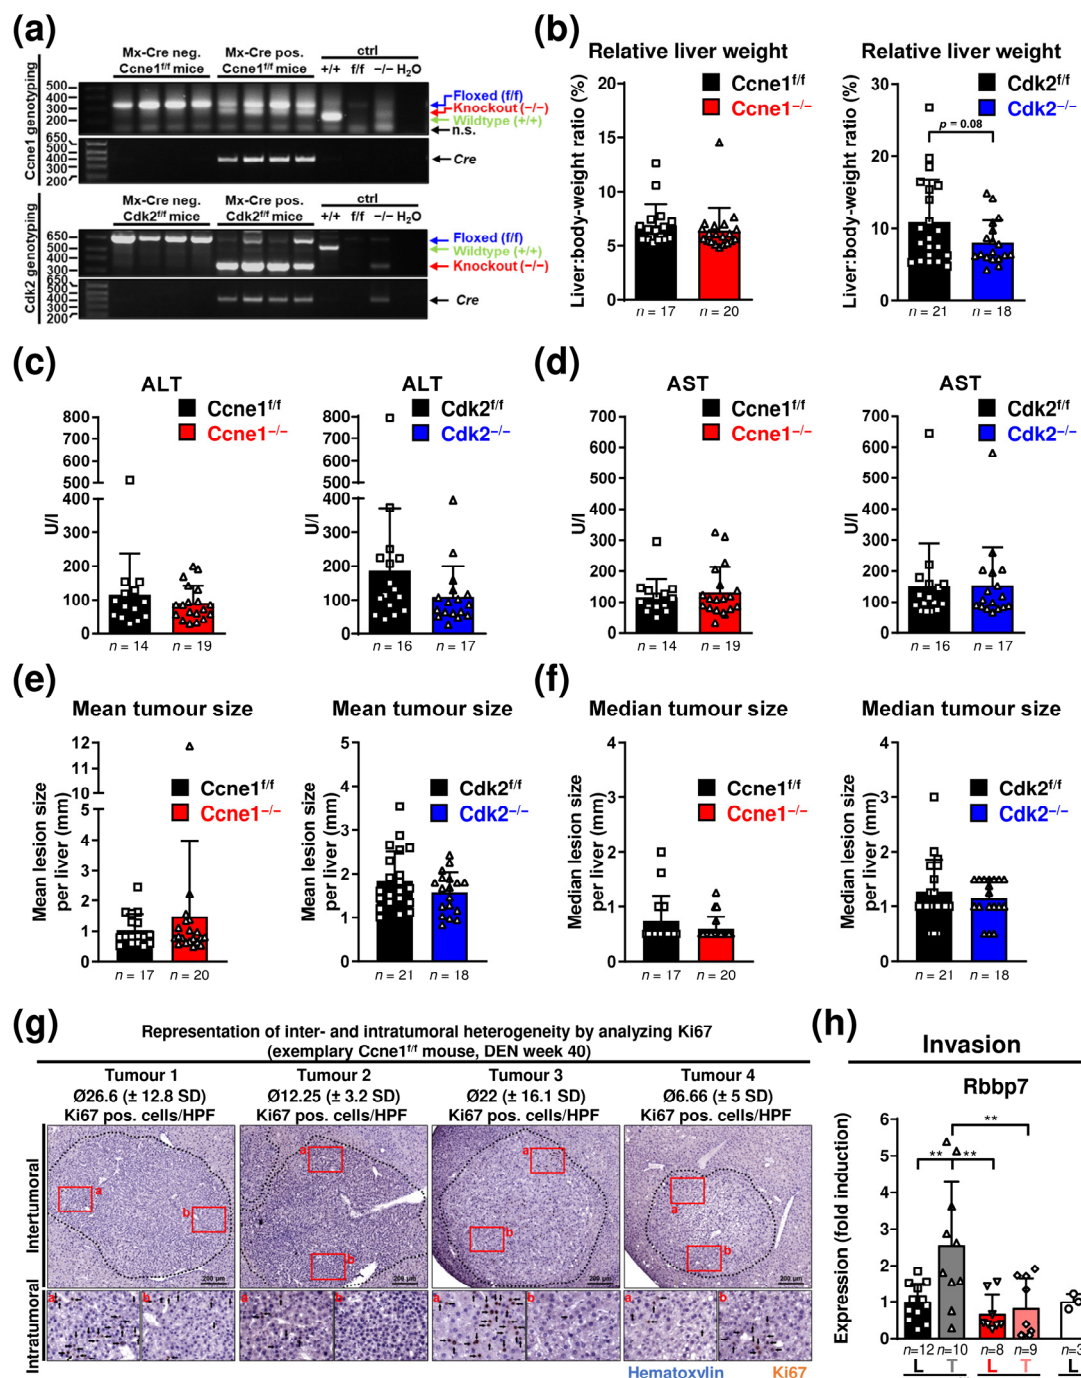

**Figure S1.** Interventional deletion of *Ccne1*, but not of *Cdk2*, restricts DEN-induced tumour progression *in vivo*. Two-week-old, Mx-Cre transgenic mice with floxed *Ccne1* or *Cdk2* alleles were treated with DEN. After tumour initiation, mice were repetitively injected with pIpC at week 22 to induce the deletion of *Ccne1* or *Cdk2* (*Ccne1*<sup>-/-</sup>, *Cdk2*<sup>-/-</sup>). Mx-Cre negative mice

also received both DEN and plpC and served as wildtype controls (*Ccne1<sup>fl/fl</sup>*, *Cdk2<sup>fl/fl</sup>*). HCC progression was analysed after week 40. Details are given in Figure 1a and the method section. **(a)** Verification of the genomic properties and plpC-induced deletion efficiency from liver extracts of *Ccne1<sup>fl/fl</sup>*, *Ccne1<sup>-/-</sup>*, *Cdk2<sup>fl/fl</sup>* and *Cdk2<sup>-/-</sup>* animals 38 weeks after DEN. Top: Genotyping for floxed (f/f, blue), deleted (-/-, red) or wildtype (+/+, green) variants of the *Ccne1* alleles and the presence of the *Cre*-recombinase transgene (black arrow). Bottom: Genotyping for floxed (f/f, blue), deleted (-/-, red) or wildtype (+/+, green) variants of the *Cdk2* alleles and the presence of the *Cre*-recombinase transgene (black arrow). +/+ ctrl: *Cre*-negative, homozygous wildtype control, f/f ctrl: *Cre*-negative *Ccne1<sup>fl/fl</sup>* or *Cdk2<sup>fl/fl</sup>* control, -/- ctrl: Constitutive *Ccne1<sup>-/-</sup>* / *Cre*-positive *Cdk2<sup>-/-</sup>* controls, H<sub>2</sub>O: Water control. **(b)** Liver mass index calculated as the liver:body weight ratio (%) for each *Ccne1<sup>fl/fl</sup>* (left), *Ccne1<sup>-/-</sup>* (left) or *Cdk2<sup>fl/fl</sup>* and *Cdk2<sup>-/-</sup>* (right) animal. **(c–d)** Determination of **(c)** alanine aminotransferase (ALT) and **(d)** aspartate aminotransferase (AST) activities in mouse serum. **(e)** Mean liver tumour diameter (size, mm) and **(f)** the median liver tumour diameter (size, mm) for each *Ccne1<sup>fl/fl</sup>* and *Ccne1<sup>-/-</sup>* or *Cdk2<sup>fl/fl</sup>* and *Cdk2<sup>-/-</sup>* animal. **(g)** Immunohistochemical staining for Ki67 (brown) in paraffin sections of one exemplary *Ccne1<sup>fl/fl</sup>* animal demonstrating the heterogeneity of tumour growth. Total nuclei were stained with hematoxylin (blue). The intertumoral variation between four individual tumours (Tumour 1–4) is represented by mean values (Ø) of Ki67-positive cells at a magnification of 200x. The intratumoral variation for each tumour is represented by the standard deviation (± SD) of Ki67-positive cells. Characteristic tissue areas are enlarged (a, b). **(h)** Gene expression analyses in *Ccne1<sup>fl/fl</sup>* and *Ccne1<sup>-/-</sup>* animals for *Rbbp7*. L: Liver; T: Tumour tissue, Ctrl: Livers of untreated wildtype mice. Normalized expression levels were calculated as fold induction in comparison to DEN-treated control livers. Corresponding signalling pathways of the target genes are indicated in the headings. Sample sizes are indicated within diagrams. Data are expressed as mean ± SD. \*\*:  $p < 0.005$ .

## Hepatic microenvironment

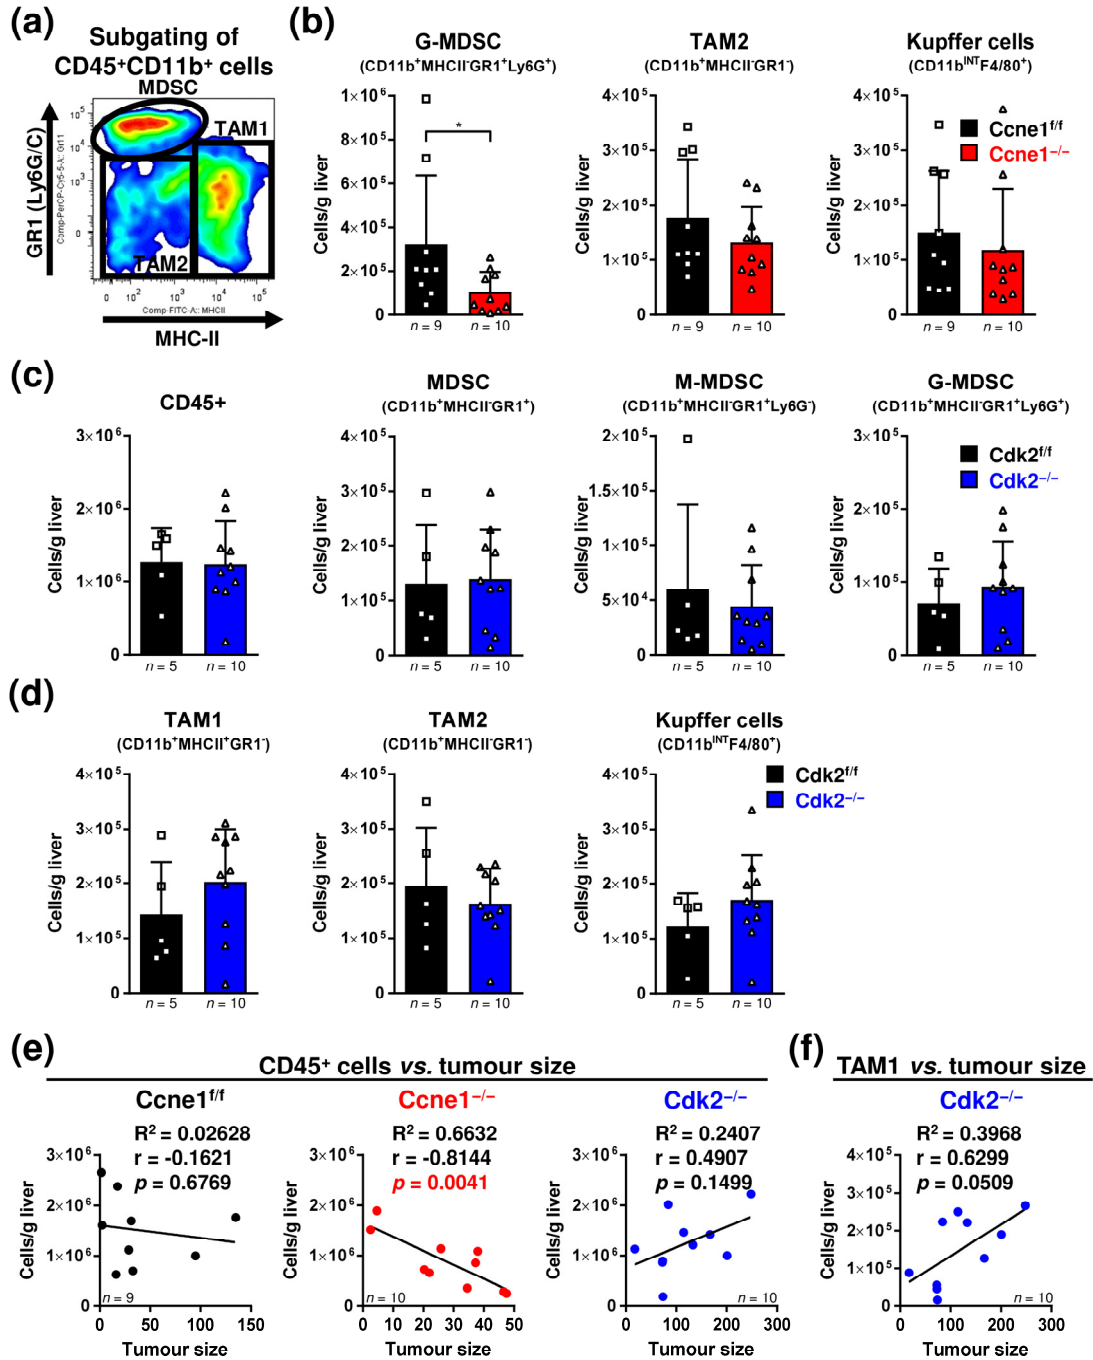

**Figure S2.** Analysis of the myeloid immune cell compartment in the HCC microenvironment of DEN-treated *Ccne1* or *Cdk2*-deficient mice. *Mx-Cre*-positive mice with floxed *Ccne1* or *Cdk2* alleles and *Cre*-negative control mice were treated with DEN at the age of 2 weeks to induce HCC. At the age of 24 weeks, mice were 3 times injected with pIpC to delete *Ccne1* or *Cdk2* in *Mx-Cre*-positive mice (*Ccne1*<sup>-/-</sup>, *Cdk2*<sup>-/-</sup>). pIpC treated *Mx-Cre*-negative mice served as wildtype controls (*Ccne1*<sup>f/f</sup>, *Cdk2*<sup>f/f</sup>). HCC progression was analysed at week 40. Details are given in Figure 1a and the method section. (a–d) Determination of immune cell populations by flow cytometry analysis. (a) Gating strategy for CD45/CD11b-positive MDSC, TAM1, TAM2 according to the expression of GR1 (Ly6G/C, PerCP-Cy5.5-A) and MHCII (FITC-A) was performed after Kupffer cell exclusion. (b) Number of G-MDSCs, TAM2 and Kupffer cells per gram liver of *Ccne1*<sup>f/f</sup> and *Ccne1*<sup>-/-</sup> mice. (c) Number of CD45-positive cells, MDSCs, M-MDSCs, G-MDSCs, (d) TAM1, TAM2 and Kupffer cells and per gram liver of *Cdk2*<sup>f/f</sup> and *Cdk2*<sup>-/-</sup> mice. Data are expressed as mean ± SD. \*: *p* < 0.05. (e) Linear analysis of the correlation between tumour size and number of CD45-positive cells per gram liver in *Ccne1*<sup>f/f</sup> (black), *Ccne1*<sup>-/-</sup> (red) or *Cdk2*<sup>-/-</sup> (blue) mice. (f) Linear analysis of the correlation between tumour size and number of TAM1-positive cells per gram liver in *Cdk2*<sup>-/-</sup> (blue) mice. R<sup>2</sup>: Coefficient of determination, *r*: Pearson correlation coefficient, *p* - values are indicated within diagrams. (g) Gene expression analysis of *Ccl2* and *Ccl5* in *Ccne1*<sup>f/f</sup> or *Ccne1*<sup>-/-</sup> mice. L: Liver; T: Tumour tissue; Ctrl:

Livers of untreated wildtype mice. Normalized expression levels were calculated as fold induction in comparison to DEN-treated control livers. Sample sizes are indicated within diagrams. Data are expressed as mean  $\pm$  SD. \*:  $p < 0.05$ .

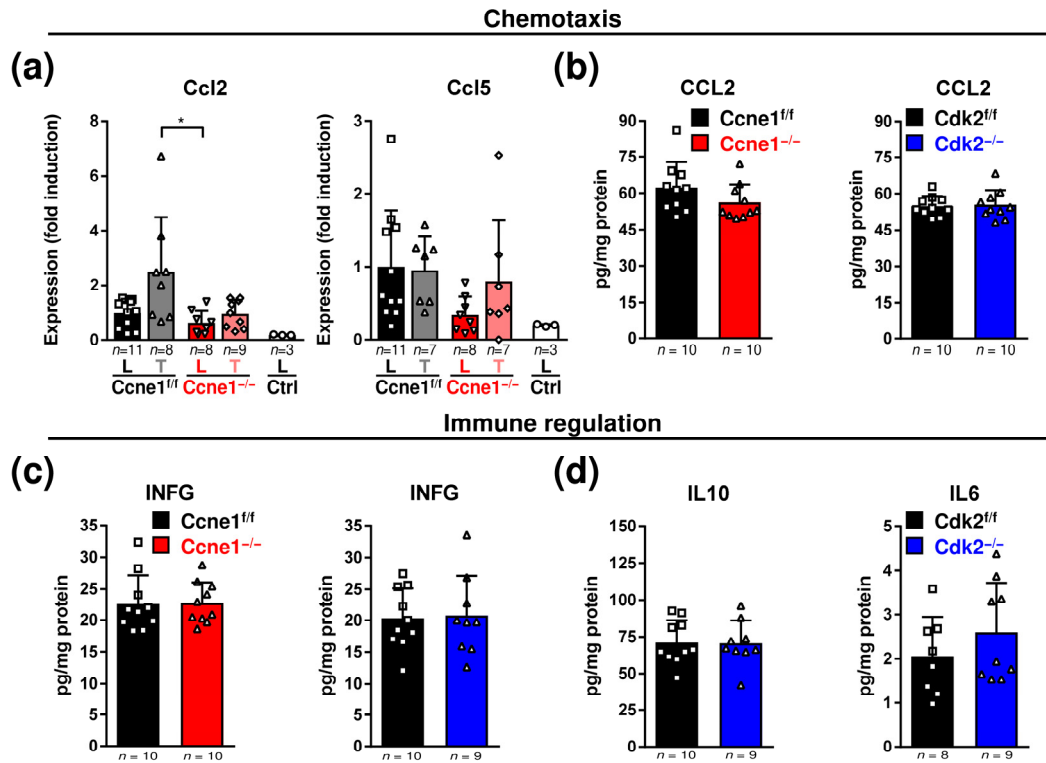

**Figure S3.** Determination of immune mediators for recruitment, activation and response of myeloid immune cells in the HCC microenvironment of DEN-treated *Ccne1* or *Cdk2*-deficient mice. *Mx-Cre*-positive mice with floxed *Ccne1* or *Cdk2* alleles and *Cre*-negative control mice were treated with DEN at the age of 2 weeks to induce HCC. At the age of 24 weeks, mice were 3 times injected with pIpC to delete *Ccne1* or *Cdk2* in *Mx-Cre*-positive mice (*Ccne1*<sup>-/-</sup>, *Cdk2*<sup>-/-</sup>). pIpC treated *Mx-Cre*-negative mice served as wildtype controls (*Ccne1*<sup>f/f</sup>, *Cdk2*<sup>f/f</sup>). HCC progression was analysed at week 40. Details are given in Figure 1a and the method section. **(a)** Gene expression analysis of *Ccl2* and *Ccl5* in *Ccne1*<sup>f/f</sup> or *Ccne1*<sup>-/-</sup> mice. L: Liver; T: Tumour tissue; Ctrl: Livers of untreated wildtype mice. Normalized expression levels were calculated as fold induction in comparison to DEN-treated control livers. **(b–c)** Determination of **(b)** CCL2, **(c)** INFG in livers of *Ccne1*<sup>f/f</sup> and *Ccne1*<sup>-/-</sup> (left) or *Cdk2*<sup>f/f</sup> and *Cdk2*<sup>-/-</sup> (right) animals by ELISA. **(d)** Determination of IL10 and IL6 concentrations in DEN-treated livers of *Cdk2*<sup>f/f</sup> and *Cdk2*<sup>-/-</sup> animals by ELISA. Corresponding signalling pathways of the target genes are indicated in the headings. Data are expressed as mean  $\pm$  SD. Sample sizes are indicated within diagrams. \*:  $p < 0.05$ .

# Gene signature validation in alternative HCC models

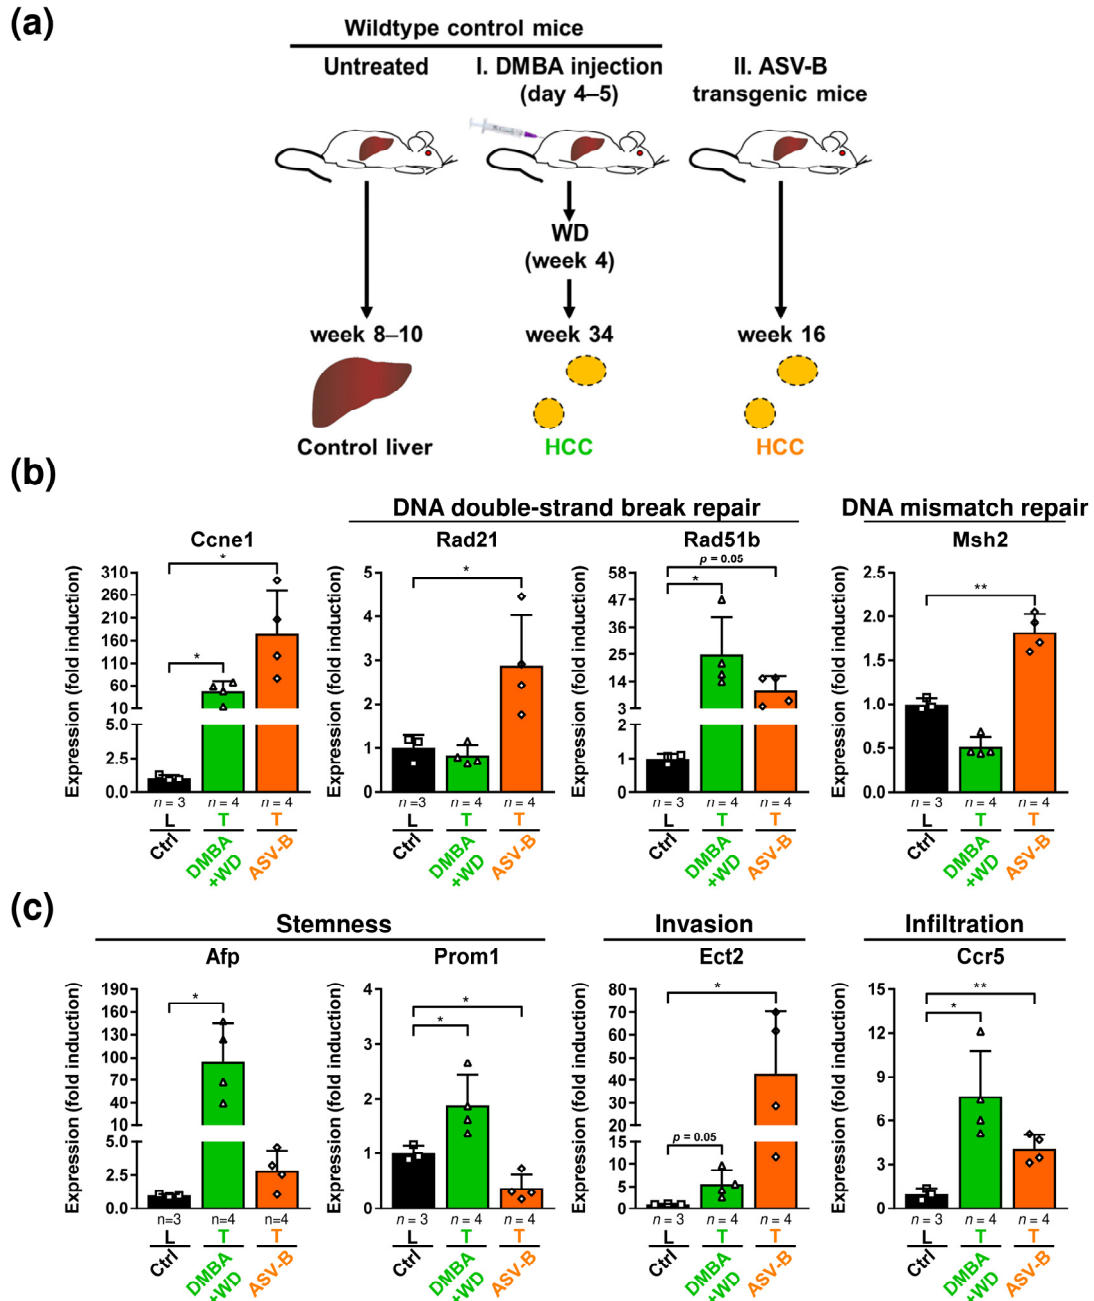

**Figure S4.** Murine HCC progression shares a common signature of enhanced *Ccne1* expression and markers of DNA damage repair, stemness and leucocyte infiltration. The verification of a common gene expression signature, which was obtained from the DEN-induced model of hepatocarcinogenesis, was carried out in tumour samples from two additional, independent HCC mouse models. **(a)** Schematic representation of the experimental approach. In the first investigated model (I), HCC development was driven by the carcinogen 7,12-Dimethylbenz[a]anthracene (DMBA, injected at postnatal day 4–5) combined with a Western diet (WD)-induced non-alcoholic steatohepatitis (NASH, 30 weeks of feeding) in C57B6/J-wildtype mice (Ctrl). Dissected HCCs were analysed in comparison to untreated livers of 8 to 10-week-old C57B6/J-wildtype mice. The second HCC model (II) comprised ASV-B transgenic mice expressing the simian virus 40 large and small T antigens under the control of the antithrombin III regulatory sequences. At the age of 16 weeks, mice were sacrificed and dissected HCCs were analysed in comparison to untreated livers of 8 to 10-week-old C57B6/J-wildtype mice (Ctrl). **(b–c)** Gene expression analysis by qPCR. **(b)** Analysis of *Ccne1*, *Rad51b*, *Rad21*, *Msh2*. **(c)** Analysis of *Afp*, *Prom1*, *Ect2* and *Ccr5*. Corresponding signalling pathways of the target genes are indicated in the headings. Normalized expression levels were calculated as fold induction in comparison to untreated control livers. Sample sizes are indicated within diagrams. Data are expressed as mean  $\pm$  SD. \*:  $p < 0.05$ ; \*\*:  $p < 0.005$ .



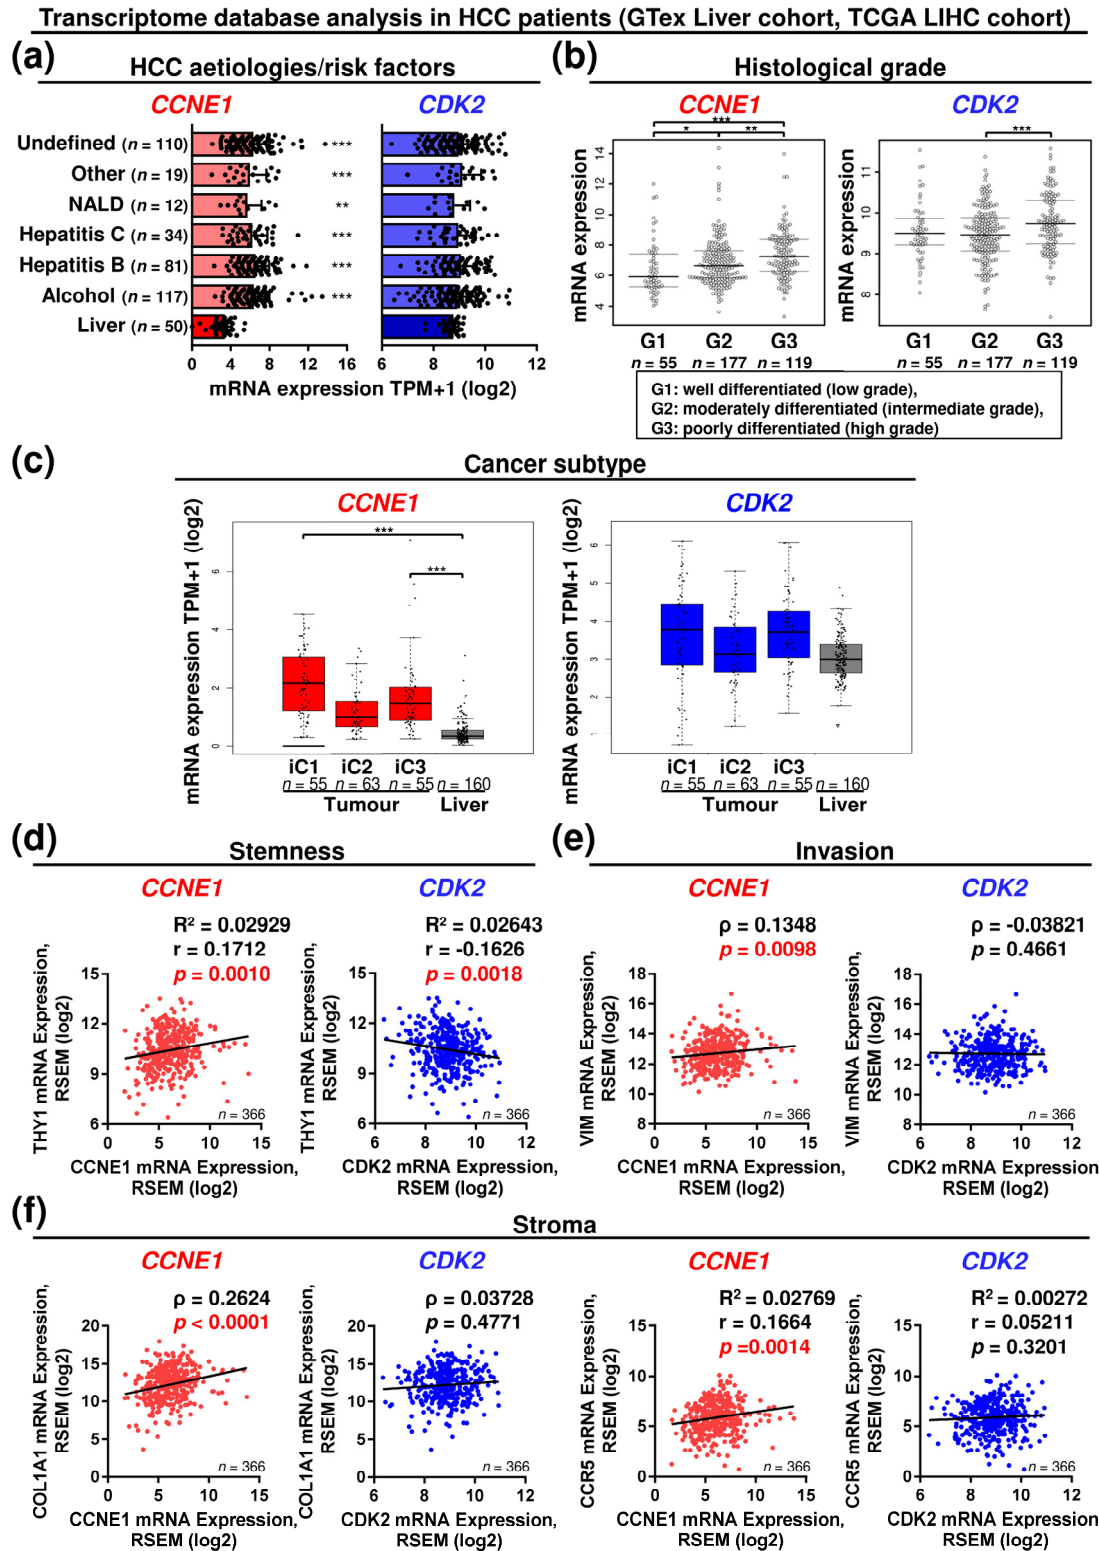

**Figure S5.** *CCNE1* expression is a diagnostic and prognostic parameter in human HCC subtypes sharing high levels of dedifferentiation, invasion, immune cell recruitment and chromosomal instability. *In silico* database analysis of *CCNE1* and *CDK2* expression in tumour samples and matching tumour free-liver samples of HCC patients based on RNA-seq data generated by the TCGA Research Network, LIHC cohort (<http://cancergenome.nih.gov/>,  $n = 373$  HCC samples,  $n = 50$  liver samples) and independent tumour-free liver samples ( $n = 110$ ) by GTex liver cohort (<http://gtexportal.org/>). Details are given in the method section. (a) mRNA expression levels of *CCNE1* (left) and *CDK2* (right) in patient healthy livers and HCC according to aetiology history. TPM: Transcript per kilobase million. (b) The mRNA expression levels of *CCNE1* (left) and *CDK2* (right) in HCC samples of different histological grades (G1, G2, G3). (c) *CCNE1* (left) and *CDK2* (right) mRNA expression in tumour-free liver samples and HCC subtypes according to iCluster grouping (iC1, iC2, iC3, according to <http://gepia2.cancer-pku.cn/>). Data are expressed as mean  $\pm$  SD. \*:  $p < 0.05$ ; \*\*:  $p < 0.005$ ; \*\*\*:  $p < 0.001$ . (d–f) Linear

analysis in human HCC patients. (d) Correlation analysis between mRNA expression levels of *CCNE1* (left) or *CDK2* (right) and *THY1* mRNA expression in HCC patients. (e) Correlation analysis between mRNA expression levels of *CCNE1* (left) or *CDK2* (right) and *VIM* mRNA expression in HCC patients. (f) Left: Correlation analysis between mRNA expression levels of *CCNE1* or *CDK2* and *COL1A1* mRNA expression in HCC patients. Right: Correlation between mRNA expression levels of *CCNE1* or *CDK2* and *CCR5* mRNA expression. Corresponding signalling pathways of the target genes are indicated in the headings.  $R^2$ : Coefficient of determination,  $r$ : Pearson correlation coefficient,  $\rho$ : Spearman correlation coefficient.  $P$ -values and sample sizes are indicated within diagrams. RSEM: RNA-Seq by Expectation-Maximization.

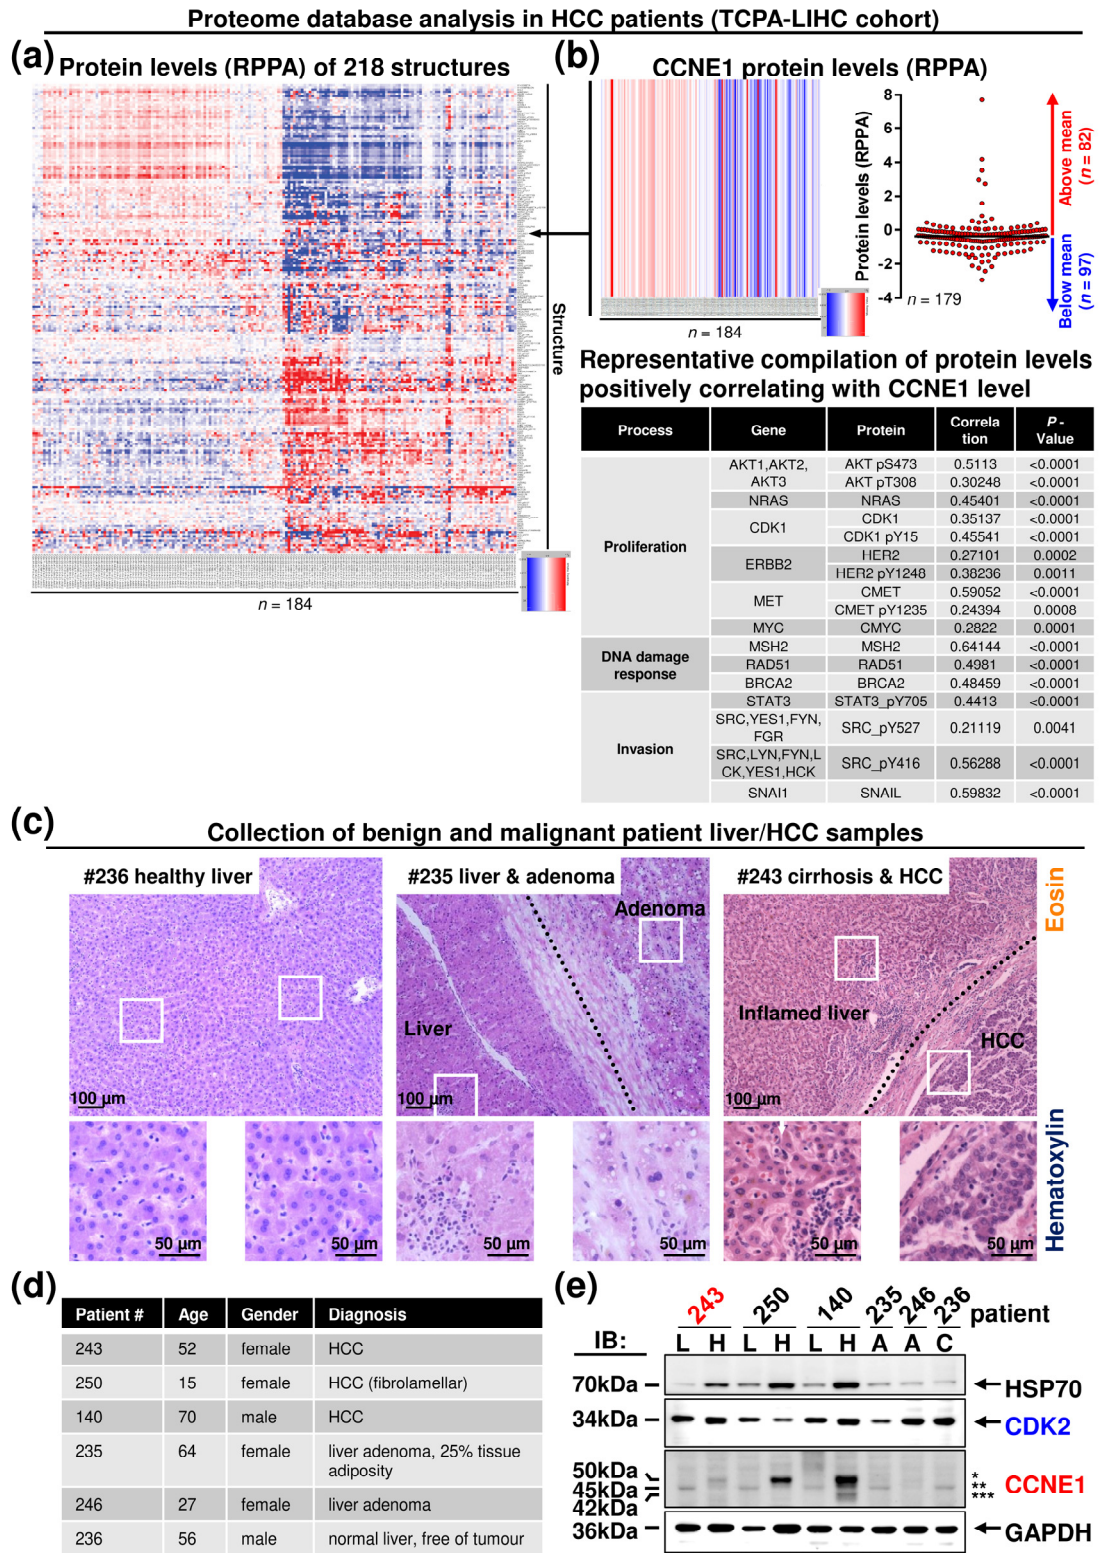

**Figure S6.** CCNE1 protein levels in advanced human HCCs are associated with markers of proliferation, DNA damage response and invasion. (a–b) *In silico* proteome database analysis of 218 target protein structures in individual HCC



patients of the LIHC cohort ( $n = 184$ ) based on reverse phase protein array (RPPA) generated by the The Cancer Protein Atlas (TCPA) portal. Details are given in the method section. (a) Heatmap representation of the total protein RPPA levels in the cohort (available at <https://www.tcpaportal.org/>). The arrow highlights CCNE1 (CYCLINE1). (b) Top: Heatmap (left) and scatter plot (right, according to <http://cbioportal.org/>) representation of the CCNE1 protein RPPA levels in the cohort. Red arrow and bars: Patients with CCNE1 levels above mean value; blue arrow and bars: Patients with CCNE1 levels below mean value. Bottom: Table of representative total and phosphorylated protein structures positively correlating with CCNE1 after analysis of RPPA levels in HCC samples.  $P$  - values and correlation coefficient are given within table (complete data are available at <https://www.tcpaportal.org/>). (c-e) Analysis of a small cohort of human hepatocellular carcinoma samples (H) and matching surrounding liver (L) tissues (#243, 250, 140), adenomas (A, #235, 246) and healthy control liver (C, #236). (c) H&E-stained liver sections of selected patients displaying healthy control liver (#236), benign liver adenoma (#235) or HCC (#243). Dashed lines highlight the border between tumorous and non-tumorous tissue. Characteristic tissue areas are enlarged. (d) Table of patient details. (e) Immunoblot analysis of CCNE1, CDK2 and the HCC biomarker heat-shock protein 70 (HSP70) from whole liver extracts of non-tumorous liver tissue (L), matching HCC (H), benign liver adenoma (A) or healthy control tissue (C). Asterisks (\*, \*\*, \*\*\*) indicate different CCNE1 isoforms (~50 kDa, ~45kDa, ~42 kDa). GAPDH served as internal loading control.

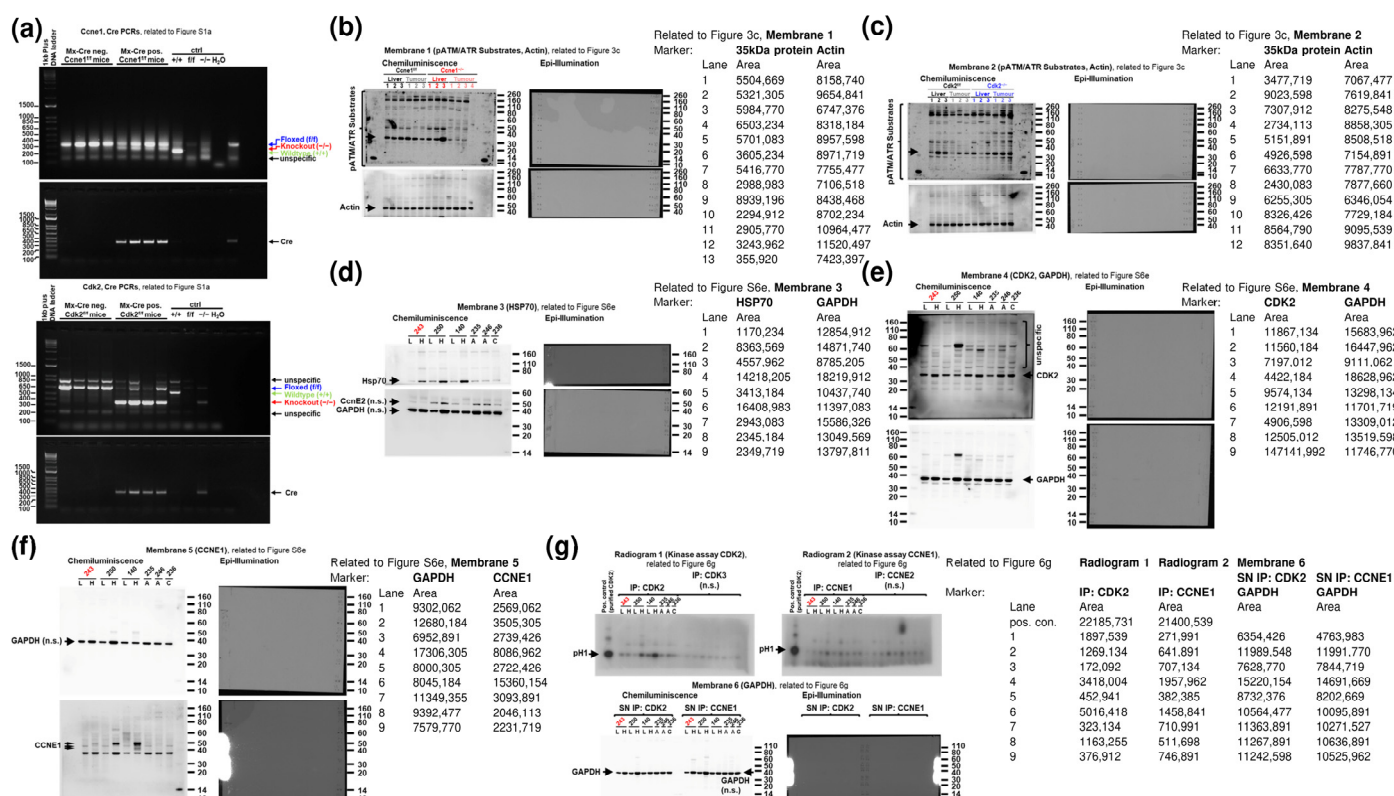

**Figure S7.** Uncropped gels, western blots and kinase assays. (a) Uncropped images after agarose gel electrophoresis for PCR-based verification of the genomic properties and pIpC-induced deletion efficiency from liver extracts of *Ccne1*<sup>+/f</sup>, *Ccne1*<sup>-/-</sup>, *Cdk2*<sup>+/f</sup> and *Cdk2*<sup>-/-</sup> animals 38 weeks after DEN, related to Figure S1a. Standard DNA sizes (100–1500 bp) are indicated. (b–g) Left: Uncropped membranes and radiograms. Images show chemiluminescence signals obtained after incubation with the corresponding primary and HRP-linked secondary antibody (chemiluminescence), epi-illumination of each membrane or phosphorylation of the substrate H1 (pH1) after kinase reaction, polyacrylamide gel electrophoresis and autoradiography (radiogram). Standard molecular weights (10–260 kDa) are indicated at each membrane. Arrows indicate markers. Right: Tables of densitometric analysis of the corresponding markers according to each lane using ImageJ Gel analyser v.1.53c (<http://imagej.nih.gov/ij/>, National institute of health, USA). (b–c) Western blots related to Figure 3b. (d–f) Western blots related to Figure S6e. (g) Radiogram and western blots related to Figure 6g. N.s.: Not shown in the corresponding Figure gels, western blots and kinase assays. (a) Uncropped images after agarose gel electrophoresis for PCR-based verification of the genomic properties and pIpC-induced deletion efficiency from liver extracts of *Ccne1*<sup>+/f</sup>, *Ccne1*<sup>-/-</sup>, *Cdk2*<sup>+/f</sup> and *Cdk2*<sup>-/-</sup> animals 38 weeks after DEN, related to Figure S1a. Standard DNAsizes (100-1500 bp) are indicated. (b–g) Left: Uncropped membranes and radiograms. Images show chemiluminescence signals obtained after incubation with the corresponding primary and HRP-linked secondary antibody (chemiluminescence), epi-illumination of each membrane or phosphorylation of the substrate H1 (pH1) after kinase reaction, polyacrylamide gel electrophoresis and autoradiography (radiogram). Standard molecular weights (10-260 kDa) are indicated at each membrane. Arrows indicate markers. Right: Tables of densitometric analysis of the corresponding markers according to each lane using ImageJ Gel



analyser v.1.53c (<http://imagej.nih.gov/ij>, National institute of health, USA). **(b-c)** Western blots related to Figure 3b. **(d-f)** Western blots related to Figure S6e. **(g)** Radiogram and western blots related to Figure 6g. N.s.: Not shown in the corresponding Figure.

**Table S1. Summary of pathological investigation.** *Mx-Cre*-positive mice with floxed *Ccne1* allele and *Cre*-negative control mice were treated with DEN at the age of 2 weeks to induce HCC. At the age of 24 weeks, mice were three times injected with pIpC to delete *Ccne1* in *Mx-Cre*-positive (*Cre* pos.) mice. pIpC treated *Mx-Cre*-negative (*Cre* neg.) mice served as wildtype controls. Mice were analysed at week 40 (N.G.); m: several tumours enumerated for 10 HPF; n.d.: not definable, excluded sample.

| Mouse, Cre status    | Number of mitoticbodies/10 HPF in tumour tissue | Number of mitoticbodies/10 HPF in non-tumorous tissue | Venous invasion(V1); 0: not detected, 1:detected |
|----------------------|-------------------------------------------------|-------------------------------------------------------|--------------------------------------------------|
| #1, <i>Cre</i> neg.  | 1                                               | 0                                                     | 1                                                |
| #2, <i>Cre</i> neg.  | 7                                               | 0                                                     | 1                                                |
| #3, <i>Cre</i> neg.  | 2                                               | 0                                                     | 0                                                |
| #4, <i>Cre</i> neg.  | 10                                              | 1                                                     | 1                                                |
| #5, <i>Cre</i> neg.  | 11                                              | 0                                                     | 1                                                |
| #6, <i>Cre</i> neg.  | 1                                               | 0                                                     | 1                                                |
| #7, <i>Cre</i> neg.  | n.d.                                            | 0                                                     | 0                                                |
| #8, <i>Cre</i> neg.  | 2                                               | 0                                                     | 0                                                |
| #9, <i>Cre</i> neg.  | 5                                               | 0                                                     | 1                                                |
| #10, <i>Cre</i> neg. | 1 (m)                                           | 0                                                     | 0                                                |
| #11, <i>Cre</i> pos. | 0 (m)                                           | 0                                                     | 0                                                |
| #12, <i>Cre</i> pos. | 1 (m)                                           | 1                                                     | 0                                                |
| #13, <i>Cre</i> pos. | 0 (m)                                           | 0                                                     | 0                                                |
| #14, <i>Cre</i> pos. | 0 (m)                                           | 0                                                     | 0                                                |
| #15, <i>Cre</i> pos. | 2                                               | 0                                                     | 0                                                |
| #16, <i>Cre</i> pos. | 0                                               | 0                                                     | 0                                                |
| #17, <i>Cre</i> pos. | 1                                               | 0                                                     | 0                                                |
| #18, <i>Cre</i> pos. | 0                                               | 0                                                     | 0                                                |
| #19, <i>Cre</i> pos. | 2                                               | 0                                                     | 0                                                |

**Table S2. Summary of iCluster molecular and clinical correlates according to Wheeler D.A. and Lewis R. R (2017).**

| Clinical/Molecular Variable   | Categories            | iCluster 1         | iCluster 2         | iCluster 3         | p value  |
|-------------------------------|-----------------------|--------------------|--------------------|--------------------|----------|
| Age                           | Mean (SD)             | 54.954<br>(15.859) | 61.164<br>(14.727) | 64.587<br>(10.067) | 0,0005   |
| Gender                        | Female (n(%))         | 28(43%)            | 14(25%)            | 18(29%)            | 0,09     |
|                               | Male (n(%))           | 37(57%)            | 41(75%)            | 45(71%)            |          |
| Race                          | American Indian       | 1(2%)              | 1(2%)              | 0(0%)              | 0,002    |
|                               | Asian                 | 30(47%)            | 7(14%)             | 15(24%)            |          |
|                               | African American      | 3(5%)              | 4(8%)              | 7(11%)             |          |
|                               | White                 | 30(47%)            | 37(76%)            | 40(65%)            |          |
| Weight                        | Normal                | 42(76%)            | 20(42%)            | 18(34%)            | 5,00E-05 |
|                               | Obese                 | 8(15%)             | 13(27%)            | 13(25%)            |          |
|                               | Overweight            | 5(9%)              | 15(31%)            | 22(42%)            |          |
| Grade                         | G1                    | 5(8%)              | 17(32%)            | 10(16%)            | 0,0006   |
|                               | G2                    | 28(43%)            | 27(51%)            | 32(52%)            |          |
|                               | G3                    | 32(49%)            | 9(17%)             | 20(32%)            |          |
| MacrovascularInvasion         | Yes                   | 5(10%)             | 0(0%)              | 3(6%)              | 0,01     |
|                               | MicrovascularInvasion | 18(35%)            | 7(15%)             | 18(33%)            |          |
|                               | None                  | 29(56%)            | 39(85%)            | 33(61%)            |          |
| <i>CTNNB1</i> mutation        |                       | 8(12%)             | 21(38%)            | 27(43%)            | 0,0002   |
| <i>TERT</i> promoter mutation |                       | 14(22%)            | 31(56%)            | 34(55%)            | 7,24E-05 |
| <i>TP53</i> mutation          |                       | 16(25%)            | 13(25%)            | 28(45%)            | 0,03     |

|                    |     |         |         |         |          |
|--------------------|-----|---------|---------|---------|----------|
| <b>Hoshida</b>     | 1   | 15(23%) | 11(20%) | 1(2%)   | 5,59E-14 |
|                    | 2   | 46(71%) | 17(31%) | 20(32%) |          |
|                    | 3   | 4(6%)   | 27(49%) | 42(67%) |          |
| <b>Age &gt; 65</b> | No  | 48(74%) | 30(55%) | 31(49%) | 0,01     |
|                    | Yes | 17(26%) | 25(45%) | 32(51%) |          |

**Table S3.** Primer sequences for quantitative real-time PCR.

| Gene          | Origin | Orientation | Sequence in 5'-3' orientation |
|---------------|--------|-------------|-------------------------------|
| <i>Afp</i>    | murine | sense       | AGCAAAGCTGCGCTCTCTAC          |
|               |        | antisense   | AGGGGCTTTCTCGTGTAAC           |
| <i>Ccl2</i>   | murine | sense       | GTGTTGGCTCAGCCAGATGC          |
|               |        | antisense   | GACACCTGCTGCTGGTGATCC         |
| <i>Ccl5</i>   | murine | sense       | GCTGCTTTGCCTACCTCTCC          |
|               |        | antisense   | TCGAGTGACAAACACGACTGC         |
| <i>Ccna2</i>  | murine | sense       | GTGGTGATTCAAAACTGCCA          |
|               |        | antisense   | AGAGTGTGAAGATGCCCTGG          |
| <i>Ccnd1</i>  | murine | sense       | AAGCATGCACAGACCTTTGTGG        |
|               |        | antisense   | TTCAGGCCTTGCATCGCAGC          |
| <i>Ccne1</i>  | murine | sense       | TCCACGCATGCTGAATTATC          |
|               |        | antisense   | TTGCAAGACCCAGATGAAGA          |
| <i>Ccne2</i>  | murine | sense       | AAAAAGTCTTGGGCAAGGTAAA        |
|               |        | antisense   | GCATTCTGACCTGGAACCAC          |
| <i>Ccr2</i>   | murine | sense       | TCGCTGTAGGAATGAGAAGAAGAGG     |
|               |        | antisense   | CAAGGATTCTTGGAAAGGTGGTCAA     |
| <i>Ccr5</i>   | murine | sense       | GTCAGAACGGTCAACTTTGGG         |
|               |        | antisense   | GTGTGGAAAATGAGGACTGCAT        |
| <i>Cd274</i>  | murine | sense       | CCTCGCCTGCAGATAGTTC           |
|               |        | antisense   | CCTTTGGAGCCGTGATAG            |
| <i>Col1a1</i> | murine | sense       | TCTGACTGGAAGAGCGGAGAG         |
|               |        | antisense   | GGCACAGACGGCTGAGTAGG          |
| <i>Ect2</i>   | murine | sense       | GGATTCTGGATCAGCCACAT          |
|               |        | antisense   | ACGTCAGAGGAGCTTCCAAA          |
| <i>Rad51b</i> | murine | sense       | CAATCCCAGTTACATTTCAACCGAT     |
|               |        | antisense   | ACGACTTCCCACCTCAGTG           |
| <i>Gapdh</i>  | murine | sense       | TGTTGAAGTCACAGGAGACAACCT      |
|               |        | antisense   | AACCTGCCAAGTATGATGACATCA      |
| <i>Icam1</i>  | murine | sense       | GCCAGGAGCCGGACTTTTCG          |
|               |        | antisense   | GGCAGGAAACAGGCCTTCCAGGG       |
| <i>Il10</i>   | murine | sense       | GCCAAGCCTTATCGGAAATGA         |
|               |        | antisense   | CTTGATTCTTGGGCCATGCT          |
| <i>Msh2</i>   | murine | sense       | TCCATCCTCAGGTCAGCAAC          |
|               |        | antisense   | TGGGTGGCAAACATGCAAAA          |
| <i>Prom1</i>  | murine | sense       | CAAACCCATGGCCACCGCGA          |
|               |        | antisense   | CACCGTGGCTTTCCCTATGCCG        |
| <i>Rad21</i>  | murine | sense       | GCCGAGATCCAGGTTTCTTC          |
|               |        | antisense   | ACATGGGCTTTGGTTAGCTTC         |
| <i>Rbbp7</i>  | murine | sense       | TTCAAACATCTCTTTACTCGCCATC     |
|               |        | antisense   | TTCAAACATCTCTTTACTCGCCATC     |
| <i>Snai1</i>  | murine | sense       | CCCTTCAGGCCACCTTCTTT          |
|               |        | antisense   | ATGTGTCCAGTAACCACCCTG         |

**Table S4.** Primer sequences for genotyping PCR.

| Gene         | Primer | Sequence in 5'-3' orientation | Combina-tion | Signal (length)    |
|--------------|--------|-------------------------------|--------------|--------------------|
| <i>Ccne1</i> | P1     | CGCATACTGAGACACAGACT          | P1 + P2      | WT (230 bp)        |
|              | P2     | CGCCATGGTTATCCGGGAGATGG       |              | KO (310 bp)        |
|              | P3     | GAAGAGGGCATCAGATCCTATTAC      | P1 + P3      | bp)/floxed(350 bp) |
| <i>Cdk2</i>  | P1     | CAAGTTGACGGGAGAAGTTGTG        | P1 + P2      | WT (560 bp)        |
|              | P2     | GAAGACCCTCCAGGTGAATGAA        |              | KO (360 bp)        |
|              | P3     | GCGATAAGCTTCGAGGGACC          | P1 + P3      | bp)/floxed(670 bp) |
| <i>Cre</i>   | P1     | CCACGACCAAGTGACAGCAAT         | P1 + P2      | Cre (392 bp)       |
|              | P2     | TTCGGATCATCAGCTACACCA         |              |                    |

**Table S5.** Antibodies for Western Blot, Immunofluorescence and flowcytometry.

| Product                                                              | Company                            |
|----------------------------------------------------------------------|------------------------------------|
| <b>Primary antibodies (non-conjugated)</b>                           |                                    |
| Alpha Smooth Muscle Actin [1A4], A2547                               | Sigma-Aldrich                      |
| HSP70, MAB1663                                                       | R&D Systems                        |
| Beta Actin, ab8227                                                   | Abcam                              |
| Cyclin E1 (M-20), sc-481 or (HE-12), sc-247                          | Santa Cruz Biotechnology           |
| Cyclin E1 07-687                                                     | Merck Millipore                    |
| GAPDH (MCA4739)                                                      | AbD Serotec                        |
| CDK2 (D-12), sc-6248                                                 | Santa Cruz Biotechnology           |
| Ki-67 [SP6], ab16667                                                 | Abcam                              |
| Phospho-Histone H2A.X, Ser139 (20E3), #9718                          | Cell Signaling Technology          |
| Phospho-(Ser/Thr) ATM/ATR Substrate Antibody, #2851                  | Cell Signaling Technology          |
| <b>Primary antibodies (fluorescence-labeled) &amp; dyes</b>          |                                    |
| Hoechst 33342 Solution, 561908                                       | BD Bioscience                      |
| CD11b-BV711 (M1/70), 563168 or CD11b-PerCP-Cy5.5(M1/70), 550993      | BD Bioscience                      |
| CD11b-PE BD (M1/70), 12-0112-82                                      | Invitrogen Thermo FisherScientific |
| CD11c-AL700 (HL3), 560583                                            | BD Bioscience                      |
| CD11c-APC (N418), 117312                                             | Biolegend                          |
| CD19-AL700 (eBio1D3), 56-0193-80 or CD19-PE-Cy5(eBio1D3), 15-0193-81 | Invitrogen Thermo FisherScientific |
| CD25-PerCP-Cy5.5 (PC61), 551071                                      | BD Bioscience                      |
| CD3-APC (145-2C11), 17-0031-82 or CD3-PE-Cy7(145-2C11), 25-0031-82   | Invitrogen Thermo FisherScientific |
| CD45-AL700 (30-F11), 56-0451-82                                      | Invitrogen Thermo FisherScientific |
| CD45-APC-Cy7 (30-F11), 557659                                        | BD Bioscience                      |
| CD4-APC (GK1.5), 17-0041-83 or CD4-eFluor450 (GK1.5),48-0041-82      | Invitrogen Thermo FisherScientific |
| CD4-FITC (RM4-5), 553046                                             | BD Bioscience                      |
| CD4-PE (GK1.5), 12-0041-83                                           | Invitrogen Thermo FisherScientific |
| CD8-BV711 (53-6.7),100759                                            | Biolegend                          |
| CD8-FITC (53-6.7), 11-0081-85                                        | Invitrogen Thermo FisherScientific |
| CD8-PE (53-6.7), 553033                                              | BD Bioscience                      |
| F4/80-PE-Cy7 (BM8), 15-4801-82                                       | Invitrogen Thermo FisherScientific |
| GR-1-APC (RB6-8C5), 17-5931-82 or GR-1-PE (RB6-8C5),12-5931-83       | BD Bioscience                      |
| GR-1-PerCP-Cy5.5 (RB6-8C5), 552093                                   | Invitrogen Thermo FisherScientific |
| Ly6G-AL700 (1A8), 127622 or Ly6G-PE (1A8), 551461                    | Biolegend                          |
| Ly6G-APC (1A8), 17-9668-82                                           | Invitrogen Thermo FisherScientific |
| MHCII-eFluor450 (M5/114.15.2), 48-5321-82                            | Invitrogen Thermo FisherScientific |
| MHCII-FITC (M5/114.15.2), 107605                                     | Biolegend                          |
| NK1.1-APC (PK136), 550627                                            | BD Bioscience                      |
| NK1.1-APC-Cy7 (PK136), 108724                                        | Biolegend                          |



---

|                                                                    |                                    |
|--------------------------------------------------------------------|------------------------------------|
| NK1.1-PE-Cy7 (PK136), 25-5941-82                                   | Invitrogen Thermo FisherScientific |
| TCRβ-PE-Cy7 (H57-597), 25-5961-82                                  | Invitrogen Thermo FisherScientific |
| 7-AAD, 559925                                                      | BD Bioscience                      |
| <b>Secondary antibodies (HRP-conjugated)</b>                       |                                    |
| mouse anti-rabbit IgG-HRP, sc-2357                                 | Santa Cruz Biotechnology           |
| m-IgGκ BP-HRP, sc-516102                                           | Santa Cruz Biotechnology           |
| m-IgGλ BP-HRP, sc-516132                                           | Santa Cruz Biotechnology           |
| ImmPRESS HRP Goat Anti-Rabbit IgG Polymer DetectionKit, Peroxidase | Vector Laboratories                |
| <b>Secondary antibodies (fluorescence-labeled)</b>                 |                                    |
| Alexa Fluor 488 goat anti-rabbit IgG, A-11008                      | Invitrogen Thermo FisherScientific |
| Alexa Fluor 594 donkey anti-rabbit IgG, A-21207                    | Invitrogen Thermo FisherScientific |

---
